# Supplementary material
Source: publisher site journal article supplement (https://www.dovepress.com/article/404248)
Supplement: Supplementary file 1 [file get_supplementary_file.php]

**Supplementary Material**

**Table s1.**Risk of bias of the observational studies as per individual sections of the Newcastle-Ottawa scale.

| **Studies** | **Selection** | **Comparability** | **Outcome** | **Total score** |
| --- | --- | --- | --- | --- |
| Streker, et al., 2013 | 2/4 | 0/2 | 2/3 | 4/9 |
| Amin, et al., 2006 | 3/4 | 0/2 | 2/3 | 5/9 |
| El-Domyati, et al., 2013 | 2/4 | 1/2 | 2/3 | 5/9 |
| Taieb, et al., 2012 | 1/4 | 1/2 | 2/3 | 4/9 |
| Niforos, et al., 2019 | 3/4 | 1/2 | 2/3 | 6/9 |
| Kerscher, et al., 2008 | 1/4 | 1/2 | 2/3 | 4/9 |
| Reuther, et al., 2010 | 2/4 | 0/2 | 2/3 | 4/9 |
| Hertz-Kleptow, et al., 2019 | 1/4 | 0/2 | 2/3 | 3/9 |
| Ayatollahi, et al., 2020 | 3/4 | 0/2 | 2/3 | 5/9 |
| Kleine-Börger, et al., 2022 | 2/4 | 0/2 | 3/3 | 5/9 |
| Draelos, et al., 2016 | 2/4 | 0/2 | 2/3 | 4/9 |
| Nikolis, et al., 2018 | 1/4 | 0/2 | 2/3 | 3/9 |
| Hsieh, et al., 2022 | 3/4 | 0/2 | 2/3 | 5/9 |

**Table s2.**Risk of bias of the observational studies as per the revised Cochrane risk-of-bias 2 tool.

| **Author, year** | **Bias arising from the randomization process** | **Bias due to deviations from intended interventions** | **Bias due to missing outcome data** | **Bias due to measurement of the outcome** | **Bias in selection of the reported result** | **Overall bias** |
| --- | --- | --- | --- | --- | --- | --- |
| Savoia, et al., 2013* |  |  |  |  |  |  |
| Sundaram, et al., 2018* |  |  |  |  |  |  |

| **Index** | |
| --- | --- |
|  | Low risk of bias |
|  | Moderate risk of bias |
|  | High risk of bias |

*Randomized Controlled Trials
